# Supplementary material for: Identification of a Small-Molecule Inhibitor That Disrupts the SIX1/EYA2 Complex, EMT, and Metastasis
Source: Oxford University Press journal article supplement (doi:10.1158/0008-5472.can-20-0435), 2020-04-27
Supplement: 00085472can200435-sup-237008_2_supp_6230297_q8sr14.docx [file 00085472can200435-sup-237008_2_supp_6230297_q8sr14.docx]

| Western Blotting | | | |
| --- | --- | --- | --- |
| Antibody Name | Company | Cat# | Dilution |
| anti-SIX1 IgG | Cell Signaling | D4A8K | 1/1000 |
| anti-EYA2 IgG | Sigma Aldrich | HPA027024 | 1/1000 |
| anti-pSMAD3 IgG | Cell Signaling | C25A9 | 1/1000 |
| anti-SMAD3 IgG | Invitrogen | 51-1500 | 1/1000 |
| anti-FN1 IgG | BD Bioscience | 610077 | 1/500 |
| anti-E-Cadherin IgG | Cell Signaling | 3195S | 1/3000 |
| anti-β Actin IgG | Sigma Aldrich | A5316 | 1/3000 |
| anti-mouse IgG-HRP | Sigma Aldrich | A9044 | 1/10000-1/3000 |
| anti-rabbit IgG-HRP | Sigma Aldrich | A9169 | 1/3000-1/1000 |
| Immunocytochemistry | | | |
| Antibody Name | Company | Cat# | Dilution |
| anti-E-cadherin IgG | Cell Signaling | 3195S | 1/300 |
| anti-FN1 IgG | BD Bioscience | 610077 | 1/300 |
| Alexa Fluor 488 conjugated secondary antibody (anti-rabbit) | Invitrogen | A11008 | 1/300 |
| Alexa Fluor 594 conjugated secondary antibody (anti-mouse) | Invitrogen | A11032 | 1/300 |
| Immunohistochemistry | | | |
| Antibody Name | Company | Cat# | Dilution |
| anti-Ki67 IgG | Thermo Fisher | RM-9106 | 1/300 |
| anti-Cleaved Caspase-3 IgG | Cell Signaling | 9661 | 1/1000 |
| anti-Ecadherin IgG | Cell Signaling | 3195S | 1/200 |
| anti-FN1 IgG | BD Bioscience | 610077 | 1/200 |
